# Supplementary material for: Differential analysis of quantitative proteome and acetyl-proteome profiling between premenopausal and postmenopausal ovarian tissues
Source: Clin Proteomics. 2018 Nov 16;15:36. doi: 10.1186/s12014-018-9214-0 (PMC6238338; doi:10.1186/s12014-018-9214-0)
Supplement: Supplementary file 2 — Additional file 2: Table S2. Differential protein expression in postmenopause and premenopause samples. [file 12014_2018_9214_MOESM2_ESM.xlsx]

## Sheet: menopvspre_menop
Protein accession	Protein description	menop/pre_menop Ratio	Regulated Type	menop/pre_menop P value	Gene name	MW [kDa]	Score	Coverage [%]	#Peptides	#PSMs	#Unique peptides
A0A0C4DH25	Immunoglobulin kappa variable 3-20	1.35133	Up	0.00422868	IGKV3D-20	12.515	2.7597	27.6	3	6	1
O00151	PDZ and LIM domain protein 1	1.31733	Up	0.011945	PDLIM1	36.071	28.81	17.6	6	7	6
O00182	Galectin-9	1.53567	Up	0.00455698	LGALS9	39.518	1.3812	2.3	1	1	1
O14920	Inhibitor of nuclear factor kappa-B kinase subunit beta	11.2705	Up	0.0185376	IKBKB	86.563	5.764	4	3	3	3
O15061	Synemin	1.51167	Up	0.014381	SYNM	172.77	26.336	5.2	7	7	7
O15230	Laminin subunit alpha-5	1.34367	Up	0.000326063	LAMA5	399.73	323.31	17.7	51	66	50
O75112	LIM domain-binding protein 3	1.94733	Up	0.00732152	LDB3	77.134	46.15	9.8	5	6	5
O75792	Ribonuclease H2 subunit A	1.33567	Up	0.00209311	RNASEH2A	33.395	6.4162	12.7	3	3	3
O75888	Tumor necrosis factor ligand superfamily member 13	1.50533	Up	0.00443814	TNFSF13	27.433	2.1005	4	1	1	1
O75891	Cytosolic 10-formyltetrahydrofolate dehydrogenase	1.34967	Up	0.0479576	ALDH1L1	98.828	22.324	6.2	5	5	5
O76070	Gamma-synuclein	1.82067	Up	0.00162157	SNCG	13.331	91.1	69.3	8	11	8
O76076	WNT1-inducible-signaling pathway protein 2	2.04967	Up	0.000115396	WISP2	26.825	73.963	24.8	4	6	4
O94811	Tubulin polymerization-promoting protein	1.42267	Up	0.0393832	TPPP	23.693	11.982	15.1	3	3	3
O94875	Sorbin and SH3 domain-containing protein 2	1.32533	Up	0.00623837	SORBS2	124.11	124.16	19.5	20	24	20
O95251	Histone acetyltransferase KAT7	1.69567	Up	0.0306395	KAT7	70.642	5.9324	5.4	3	4	3
P00325	Alcohol dehydrogenase 1B	1.634	Up	0.000344166	ADH1B	39.854	208.2	47.2	19	32	19
P00450	Ceruloplasmin	1.30267	Up	0.00499238	CP	122.2	323.31	32.1	26	56	26
P00568	Adenylate kinase isoenzyme 1	1.43567	Up	0.0041568	AK1	21.635	192.35	61.3	14	31	14
P00751	Complement factor B	1.40233	Up	0.000842408	CFB	85.532	323.31	44.2	34	62	34
P00915	Carbonic anhydrase 1	2.04233	Up	0.00539138	CA1	28.87	235	51.3	9	20	9
P00918	Carbonic anhydrase 2	1.68067	Up	0.019601	CA2	29.246	59.8	41.9	9	15	9
P01023	Alpha-2-macroglobulin	1.308	Up	0.00221462	A2M	163.29	323.31	34.9	42	72	37
P01031	Complement C5	1.886	Up	0.000133152	C5	188.3	130.61	14.4	22	27	22
P01034	Cystatin-C	1.37933	Up	0.00812343	CST3	15.799	37.385	36.3	4	4	4
P01599	Immunoglobulin kappa variable 1-17	1.32733	Up	0.0277024	IGKV1-17	12.778	5.5189	10.3	2	2	2
P01861	Ig gamma-4 chain C region	2.06133	Up	0.00422813	IGHG4	35.94	121.38	56.9	12	76	6
P01876	Ig alpha-1 chain C region	1.38633	Up	0.00238934	IGHA1	37.654	323.31	56.4	14	42	5
P01880	Ig delta chain C region	1.53133	Up	0.0254603	IGHD	42.253	15.209	9.6	3	4	3
P01903	"HLA class II histocompatibility antigen, DR alpha chain"	1.55867	Up	0.00227665	HLA-DRA	28.607	116.82	32.7	7	12	7
P02042	Hemoglobin subunit delta	2.486	Up	0.000243938	HBD	16.055	150.62	83.7	12	66	6
P02458	Collagen alpha-1(II) chain	1.97533	Up	0.0207641	COL2A1	141.78	11.529	6.9	9	15	5
P02511	Alpha-crystallin B chain	1.603	Up	0.00759646	CRYAB	20.159	36.089	41.1	8	18	8
P02649	Apolipoprotein E	2.92733	Up	0.000495554	APOE	36.154	214.44	60.3	22	37	22
P02654	Apolipoprotein C-I	2.07233	Up	0.0010135	APOC1	9.3318	27.833	37.3	5	9	5
P02655	Apolipoprotein C-II	1.56667	Up	0.00397312	APOC2	11.284	13.736	28.7	3	3	3
P02656	Apolipoprotein C-III	1.52833	Up	0.000257342	APOC3	10.852	132.89	34.3	3	7	3
P02671	Fibrinogen alpha chain	1.32	Up	0.000494342	FGA	94.972	323.31	41.5	35	77	35
P02675	Fibrinogen beta chain	1.416	Up	0.00918505	FGB	55.928	323.31	60.9	27	56	27
P02679	Fibrinogen gamma chain	1.336	Up	0.00496286	FGG	51.511	323.31	46.8	20	40	20
P02730	Band 3 anion transport protein	1.75133	Up	0.00792134	SLC4A1	101.79	70.317	12	8	11	8
P02743	Serum amyloid P-component	2.949	Up	0.00292813	APCS	25.387	161.26	39.9	9	45	9
P02748	Complement component C9	1.63933	Up	0.00314351	C9	63.173	155.77	32.2	16	29	16
P02750	Leucine-rich alpha-2-glycoprotein	1.31933	Up	0.0146085	LRG1	38.177	19.974	20.2	6	9	6
P02753	Retinol-binding protein 4	1.45367	Up	0.00039848	RBP4	23.01	151.55	38.3	7	11	7
P02760	Protein AMBP	1.63067	Up	0.00040707	AMBP	38.999	214.93	26.1	8	26	8
P02766	Transthyretin	1.35267	Up	0.017932	TTR	15.887	279.9	64.6	6	20	6
P02774	Vitamin D-binding protein	1.372	Up	0.01414	GC	52.963	323.31	60.5	30	70	30
P02792	Ferritin light chain	2.04367	Up	0.00294324	FTL	20.019	114.12	46.9	7	10	7
P02794	Ferritin heavy chain	2.27967	Up	0.00419208	FTH1	21.225	170.23	61.2	8	15	8
P03973	Antileukoproteinase	2.192	Up	0.000876109	SLPI	14.326	2.8452	11.4	1	1	1
P04004	Vitronectin	1.734	Up	0.000259249	VTN	54.305	172.79	29.1	12	31	12
P04040	Catalase	1.361	Up	0.00225762	CAT	59.755	164.14	35.5	18	23	18
P04114	Apolipoprotein B-100	1.35033	Up	0.000541745	APOB	515.6	323.31	13.1	53	63	53
P04439	"HLA class I histocompatibility antigen, A-3 alpha chain"	2.44167	Up	0.00332634	HLA-A	40.84	4.4241	40.5	10	15	2
P05107	Integrin beta-2	1.446	Up	0.000489717	ITGB2	84.781	10.675	5.6	4	4	4
P05155	Plasma protease C1 inhibitor	1.32267	Up	0.0178761	SERPING1	55.154	17.09	13.8	7	7	7
P05156	Complement factor I	1.40733	Up	0.00535497	CFI	65.75	89.508	24.5	12	17	12
P05160	Coagulation factor XIII B chain	1.38533	Up	0.0204154	F13B	75.51	14	5.4	2	2	2
P05452	Tetranectin	1.342	Up	0.0026912	CLEC3B	22.537	69.936	38.1	7	16	7
P06681	Complement C2	1.30167	Up	0.00140601	C2	83.267	69.382	20.7	14	22	14
P06702	Protein S100-A9	1.43967	Up	0.0122296	S100A9	13.242	21.511	43.9	5	8	5
P07585	Decorin	1.39367	Up	0.0246749	DCN	39.746	202.6	38.4	13	39	12
P07738	Bisphosphoglycerate mutase	1.436	Up	0.0231031	BPGM	30.005	7.9546	17.4	4	4	4
P08294	Extracellular superoxide dismutase [Cu-Zn]	2.07733	Up	0.000122403	SOD3	25.851	154.76	36.2	7	14	7
P08493	Matrix Gla protein	2.214	Up	0.00102706	MGP	12.353	9.7626	10.7	1	2	1
P08571	Monocyte differentiation antigen CD14	1.31533	Up	0.0335279	CD14	40.076	116.83	20.3	5	5	5
P09172	Dopamine beta-hydroxylase	2.76867	Up	0.000976523	DBH	69.064	2.5963	1.6	1	2	1
P0C0L5	Complement C4-B	1.551	Up	0.0103179	C4B	192.75	323.31	37.6	57	103	3
P0DJI9	Serum amyloid A-2 protein	2.85733	Up	0.00177218	SAA2	13.527	20.65	11.5	1	1	1
P10909	Clusterin	1.811	Up	0.00302682	CLU	52.494	248.23	32.5	13	24	13
P11166	"Solute carrier family 2, facilitated glucose transporter member 1"	1.426	Up	0.0421575	SLC2A1	54.083	35.193	3.5	1	1	1
P11277	"Spectrin beta chain, erythrocytic"	2.115	Up	0.00362862	SPTB	246.47	6.9779	5	11	17	3
P13671	Complement component C6	1.447	Up	0.00196321	C6	104.79	113.73	25.4	19	27	19
P13761	"HLA class II histocompatibility antigen, DRB1-7 beta chain"	2.24533	Up	0.0245904	HLA-DRB1	29.822	4.3091	32	7	7	2
P13796	Plastin-2	1.319	Up	0.00705558	LCP1	70.288	135.75	39.9	21	26	15
P14207	Folate receptor beta	1.35067	Up	0.00283414	FOLR2	29.279	43.62	32.5	9	11	9
P14555	"Phospholipase A2, membrane associated"	2.753	Up	0.00112402	PLA2G2A	16.083	5.9481	23.6	3	3	3
P15259	Phosphoglycerate mutase 2	2.591	Up	4.15e-05	PGAM2	28.766	4.7302	25.3	6	23	1
P15559	NAD(P)H dehydrogenase [quinone] 1	1.517	Up	0.00453015	NQO1	30.867	9.8373	12.8	3	3	3
P15814	Immunoglobulin lambda-like polypeptide 1	2.13333	Up	0.0100187	IGLL1	22.963	24.086	7	1	1	1
P18428	Lipopolysaccharide-binding protein	1.322	Up	0.00949974	LBP	53.383	103.05	18.5	7	10	7
P20742	Pregnancy zone protein	1.83067	Up	0.0430526	PZP	163.86	13.336	4.9	7	11	2
P21810	Biglycan	3.42033	Up	0.00141744	BGN	41.654	323.31	42.9	13	46	12
P21980	Protein-glutamine gamma-glutamyltransferase 2	1.349	Up	0.00191025	TGM2	77.328	286.17	24.9	16	31	16
P22570	"NADPH:adrenodoxin oxidoreductase, mitochondrial"	1.332	Up	0.000501158	FDXR	53.836	206.44	45.4	18	24	18
P23381	"Tryptophan--tRNA ligase, cytoplasmic"	1.30067	Up	0.002303	WARS	53.165	153.92	33.8	13	18	13
P24844	Myosin regulatory light polypeptide 9	1.35033	Up	0.00528804	MYL9	19.827	106.39	66.3	10	31	4
P26447	Protein S100-A4	1.469	Up	0.00199991	S100A4	11.728	18.058	36.6	5	9	5
P27169	Serum paraoxonase/arylesterase 1	1.30333	Up	0.0157931	PON1	39.731	20.107	18.3	6	10	6
P27658	Collagen alpha-1(VIII) chain	1.43033	Up	0.0274511	COL8A1	73.363	38.843	3.6	2	2	2
P28065	Proteasome subunit beta type-9	1.342	Up	0.0132376	PSMB9	23.264	25.655	32	6	11	6
P30711	Glutathione S-transferase theta-1	4.29667	Up	0.00141464	GSTT1	27.335	37.588	11.7	2	2	2
P32455	Guanylate-binding protein 1	1.349	Up	0.010555	GBP1	67.93	59.254	24.8	17	20	12
P34096	Ribonuclease 4	1.57767	Up	0.0284169	RNASE4	16.84	57.152	34.7	5	6	5
P35542	Serum amyloid A-4 protein	1.391	Up	0.00725148	SAA4	14.746	10.755	33.8	4	4	4
P35625	Metalloproteinase inhibitor 3	2.98967	Up	0.00425691	TIMP3	24.145	8.5344	12.8	3	3	3
P36269	Gamma-glutamyltransferase 5	1.34667	Up	0.00380833	GGT5	62.26	40.574	11.1	6	9	6
P36980	Complement factor H-related protein 2	1.99033	Up	0.00107731	CFHR2	30.65	13.275	23	6	12	2
P40121	Macrophage-capping protein	1.45433	Up	0.000464383	CAPG	38.498	69.531	31.6	8	14	8
P41219	Peripherin	1.91467	Up	0.0155357	PRPH	53.65	12.422	21.1	11	38	7
P42224	Signal transducer and activator of transcription 1-alpha/beta	1.55133	Up	0.000853911	STAT1	87.334	131.1	30	20	26	20
P48061	Stromal cell-derived factor 1	2.75833	Up	0.00231663	CXCL12	10.666	8.9081	23.7	2	3	2
P50238	Cysteine-rich protein 1	2.002	Up	0.00353801	CRIP1	8.5328	13.749	67.5	4	7	4
P50895	Basal cell adhesion molecule	1.54	Up	0.000177007	BCAM	67.404	176.41	29.8	15	22	15
P51911	Calponin-1	1.41733	Up	0.0179952	CNN1	33.17	105.46	38.4	12	19	10
P54725	UV excision repair protein RAD23 homolog A	1.32433	Up	0.0352072	RAD23A	39.609	6.1474	11.6	5	8	3
P55083	Microfibril-associated glycoprotein 4	1.44967	Up	0.00211533	MFAP4	28.648	169.37	20	3	16	3
P55290	Cadherin-13	1.35733	Up	0.0274031	CDH13	78.286	48.225	10.2	6	9	6
P56277	Cx9C motif-containing protein 4	1.44333	Up	0.00110319	CMC4	7.7469	4.6048	25	1	1	1
P61626	Lysozyme C	1.93467	Up	0.000130318	LYZ	16.537	25.864	32.4	5	9	5
P61769	Beta-2-microglobulin	1.515	Up	0.00176341	B2M	13.714	17.659	37.8	4	7	4
P68366	Tubulin alpha-4A chain	1.68433	Up	0.00126845	TUBA4A	49.924	18.847	51.3	19	62	3
P68871	Hemoglobin subunit beta	2.22433	Up	0.00778833	HBB	15.998	323.31	94.6	13	111	7
P69891	Hemoglobin subunit gamma-1	1.31367	Up	0.00517024	HBG1	16.14	43.279	51	6	10	4
P69905	Hemoglobin subunit alpha	1.81133	Up	0.000498563	HBA1	15.257	145.34	71.1	9	43	9
P80297	Metallothionein-1X	1.48533	Up	0.00889425	MT1X	6.0683	2.6296	34.4	3	1	1
P98095	Fibulin-2	1.47067	Up	0.00468094	FBLN2	126.57	55.245	8.9	8	10	8
Q02985	Complement factor H-related protein 3	3.13667	Up	0.0102089	CFHR3	37.323	14.572	9.7	3	3	3
Q03591	Complement factor H-related protein 1	2.15633	Up	0.00251718	CFHR1	37.65	56.295	35.8	11	23	2
Q03692	Collagen alpha-1(X) chain	2.042	Up	0.00379459	COL10A1	66.157	21.636	2.9	2	5	2
Q08431	Lactadherin	2.31867	Up	0.016952	MFGE8	43.122	78.316	36.2	13	19	13
Q08830	Fibrinogen-like protein 1	2.529	Up	0.00672351	FGL1	36.379	8.1514	3.2	1	1	1
Q13228	Selenium-binding protein 1	1.31667	Up	0.00360093	SELENBP1	52.39	323.31	61	24	45	24
Q15847	Adipogenesis regulatory factor	1.62667	Up	0.00471419	ADIRF	7.8547	23.751	38.2	3	6	3
Q16527	Cysteine and glycine-rich protein 2	1.886	Up	0.00802713	CSRP2	20.954	136.45	45.1	7	12	7
Q5H9R7	Serine/threonine-protein phosphatase 6 regulatory subunit 3	1.478	Up	0.0319912	PPP6R3	97.668	1.9091	1.6	2	4	2
Q5T619	Zinc finger protein 648	1.835	Up	0.00591889	ZNF648	62.34	2.4934	2.1	1	7	1
Q5TD97	Four and a half LIM domains protein 5	1.59533	Up	0.0101351	FHL5	32.719	2.4334	6	2	2	2
Q8NCH0	Carbohydrate sulfotransferase 14	2.10633	Up	0.0288188	CHST14	42.996	6.6835	9.6	3	3	3
Q8TE57	A disintegrin and metalloproteinase with thrombospondin motifs 16	1.45933	Up	0.00052296	ADAMTS16	136.2	2.0864	0.7	1	1	1
Q8WU39	Marginal zone B- and B1-cell-specific protein	1.58067	Up	0.0140237	MZB1	20.694	44.188	21.2	2	3	2
Q92743	Serine protease HTRA1	1.95233	Up	0.00521848	HTRA1	51.286	21.989	11.2	5	6	5
Q93097	Protein Wnt-2b	1.306	Up	0.0268682	WNT2B	43.77	4.3604	6.6	3	6	2
Q96EY8	"Cob(I)yrinic acid a,c-diamide adenosyltransferase, mitochondrial"	1.48967	Up	0.0272357	MMAB	27.388	8.0135	8	2	3	2
Q96KS0	Egl nine homolog 2	2.51033	Up	0.00013151	EGLN2	43.65	1.6109	2.2	1	2	1
Q96PD5	N-acetylmuramoyl-L-alanine amidase	1.31267	Up	0.00804211	PGLYRP2	62.216	121.73	14.4	6	8	6
Q96PP9	Guanylate-binding protein 4	1.35533	Up	0.00235468	GBP4	73.164	3.3842	3.3	2	2	2
Q9BUP0	EF-hand domain-containing protein D1	1.72233	Up	0.0196042	EFHD1	26.927	18.805	22.6	5	8	4
Q9BXJ0	Complement C1q tumor necrosis factor-related protein 5	1.76267	Up	0.0230395	C1QTNF5	25.298	31.609	15.2	3	6	3
Q9BXR6	Complement factor H-related protein 5	2.34867	Up	0.00653251	CFHR5	64.419	86.171	20	9	14	8
Q9BZQ8	Protein Niban	1.36567	Up	0.0354155	FAM129A	103.13	31.52	6.7	7	7	7
Q9GZM7	Tubulointerstitial nephritis antigen-like	1.54967	Up	0.000763728	TINAGL1	52.387	83.346	30.2	12	29	12
Q9H492	Microtubule-associated proteins 1A/1B light chain 3A	1.67967	Up	0.0198544	MAP1LC3A	14.272	16.741	17.4	2	2	1
Q9H993	Protein-glutamate O-methyltransferase	2.60833	Up	0.0148534	ARMT1	51.172	2.7609	3.2	2	3	2
Q9HC16	DNA dC->dU-editing enzyme APOBEC-3G	1.36733	Up	0.0345549	APOBEC3G	46.407	3.5537	3.6	1	1	1
Q9HCJ6	Synaptic vesicle membrane protein VAT-1 homolog-like	3.23533	Up	0.00345866	VAT1L	45.899	3.3039	4.1	1	2	1
Q9NRX4	14 kDa phosphohistidine phosphatase	1.323	Up	0.0152099	PHPT1	13.832	62.254	52.8	5	5	5
Q9NZN9	Aryl-hydrocarbon-interacting protein-like 1	1.32667	Up	0.00443748	AIPL1	43.903	-2	2.6	1	1	1
Q9NZR1	Tropomodulin-2	1.32333	Up	0.00204971	TMOD2	39.595	3.1864	10.8	3	4	2
Q9UK55	Protein Z-dependent protease inhibitor	1.52367	Up	0.0094032	SERPINA10	50.706	38.899	6.1	2	2	2
Q9Y3L3	SH3 domain-binding protein 1	1.43067	Up	0.0256619	SH3BP1	75.712	5.1598	3	2	3	2
O15066	Kinesin-like protein KIF3B	0.752	Down	0.0391935	KIF3B	85.124	2.8953	2.7	2	2	2
O43556	Epsilon-sarcoglycan	0.752	Down	0.0189626	SGCE	49.85	8.6432	8.7	4	5	4
P00738	Haptoglobin	0.361667	Down	0.00137884	HP	45.205	249.68	44.3	19	31	9
P01780	Immunoglobulin heavy variable 3-7	0.700667	Down	0.00219161	IGHV3-7	12.943	25.149	32.5	4	9	2
P01782	Immunoglobulin heavy variable 3-9	0.680333	Down	0.0118564	IGHV3-9	12.945	18.717	34.7	3	5	2
P02786	Transferrin receptor protein 1	0.625667	Down	0.00397948	TFRC	84.87	22.965	13.4	9	10	9
P04216	Thy-1 membrane glycoprotein	0.491333	Down	0.00128772	THY1	17.935	32.671	14.9	2	5	2
P05093	"Steroid 17-alpha-hydroxylase/17,20 lyase"	0.314	Down	0.0176024	CYP17A1	57.37	17.939	3	1	1	1
P07942	Laminin subunit beta-1	0.603	Down	0.00398973	LAMB1	198.04	14.66	4.8	10	10	10
P07996	Thrombospondin-1	0.673333	Down	0.00258563	THBS1	129.38	223.72	15.5	14	21	3
P08311	Cathepsin G	0.448333	Down	0.000886736	CTSG	28.837	21.37	19.2	4	5	4
P08648	Integrin alpha-5	0.763667	Down	0.00651584	ITGA5	114.54	19.803	5.8	6	9	6
P11532	Dystrophin	0.740667	Down	0.0088056	DMD	426.74	92.563	6.7	22	23	20
P12109	Collagen alpha-1(VI) chain	0.621667	Down	0.00135738	COL6A1	108.53	323.31	43.3	37	134	37
P12110	Collagen alpha-2(VI) chain	0.653333	Down	0.000235146	COL6A2	108.58	323.31	35.9	36	114	36
P12111	Collagen alpha-3(VI) chain	0.597333	Down	0.000160867	COL6A3	343.67	323.31	47.7	147	471	147
P13591	Neural cell adhesion molecule 1	0.712333	Down	0.00124046	NCAM1	94.573	29.545	13.1	10	12	10
P14209	CD99 antigen	0.659667	Down	0.0441109	CD99	18.848	7.8242	13	2	4	2
P16104	Histone H2AX	0.74	Down	0.00528849	H2AFX	15.144	31.674	33.6	9	39	5
P16401	Histone H1.5	0.619333	Down	0.0137926	HIST1H1B	22.58	6.4939	22.1	6	12	2
P16402	Histone H1.3	0.672333	Down	0.0272106	HIST1H1D	22.35	2.0116	29	11	35	1
P22105	Tenascin-X	0.673	Down	0.000473206	TNXB	458.22	323.31	38.2	118	211	118
P22352	Glutathione peroxidase 3	0.642333	Down	0.00281178	GPX3	25.552	62.652	35.4	8	13	8
P22676	Calretinin	0.742333	Down	0.030677	CALB2	31.54	26.885	37.3	9	10	9
P24043	Laminin subunit alpha-2	0.592	Down	0.00282167	LAMA2	343.9	43.201	5.3	14	15	14
P27797	Calreticulin	0.767667	Down	0.00152168	CALR	48.141	35.771	17.5	7	10	7
P35555	Fibrillin-1	0.754	Down	0.00380185	FBN1	312.24	323.31	35.2	79	184	76
P35556	Fibrillin-2	0.43	Down	0.000522119	FBN2	314.77	8.2039	2.6	7	15	4
P41217	OX-2 membrane glycoprotein	0.65	Down	0.00274399	CD200	31.264	14.503	9.4	2	2	2
P42766	60S ribosomal protein L35	0.742667	Down	0.0202193	RPL35	14.551	3.9069	13.8	3	4	3
P49419	Alpha-aminoadipic semialdehyde dehydrogenase	0.748	Down	0.00257705	ALDH7A1	58.486	323.31	46.2	23	42	23
P62306	Small nuclear ribonucleoprotein F	0.705333	Down	0.00199821	SNRPF	9.7251	13.686	15.1	1	2	1
P68543	UBX domain-containing protein 2A	0.717	Down	0.0348846	UBXN2A	29.278	1.5935	7.3	2	2	2
P78417	Glutathione S-transferase omega-1	0.768333	Down	0.00470569	GSTO1	27.566	75.354	51.5	15	23	15
P80723	Brain acid soluble protein 1	0.766	Down	0.0232767	BASP1	22.693	110.72	68.3	15	27	15
Q02539	Histone H1.1	0.545667	Down	0.0105484	HIST1H1A	21.842	4.0326	24.7	8	18	3
Q13361	Microfibrillar-associated protein 5	0.721667	Down	0.0286016	MFAP5	19.611	12.02	13.3	2	4	2
Q14195	Dihydropyrimidinase-related protein 3	0.735	Down	0.00192863	DPYSL3	61.963	323.31	54.9	22	66	19
Q14699	Raftlin	0.704	Down	0.0080153	RFTN1	63.145	80.282	19.4	8	8	8
Q15063	Periostin	0.445	Down	0.000166113	POSTN	93.313	105.03	19.6	15	23	15
Q15392	Delta(24)-sterol reductase	0.478667	Down	0.0255432	DHCR24	60.101	2.8487	3.3	2	3	2
Q15582	Transforming growth factor-beta-induced protein ig-h3	0.738667	Down	0.00258443	TGFBI	74.68	270.39	37	21	39	21
Q15661	Tryptase alpha/beta-1	0.666667	Down	0.0361792	TPSAB1	30.515	46.669	18.9	5	5	5
Q2LD37	Uncharacterized protein KIAA1109	0.576667	Down	0.00999817	KIAA1109	555.48	1.6793	0.2	1	3	1
Q5H9M0	PWWP domain-containing protein MUM1L1	0.747667	Down	0.0484928	MUM1L1	79.039	2.9208	3.4	3	3	3
Q5VU43	Myomegalin	0.647333	Down	0.0311958	PDE4DIP	265.08	1.8512	0.3	1	1	1
Q71DI3	Histone H3.2	0.613333	Down	0.0185388	HIST2H3A	15.388	2.0788	26.5	6	35	1
Q71U36	Tubulin alpha-1A chain	0.767667	Down	0.0350335	TUBA1A	50.135	323.31	60.3	21	77	1
Q8IYM9	E3 ubiquitin-protein ligase TRIM22	0.763667	Down	0.00117349	TRIM22	56.947	5.0445	3.8	2	2	2
Q8N2S1	Latent-transforming growth factor beta-binding protein 4	0.757333	Down	0.0137207	LTBP4	173.43	211.41	18.1	22	27	21
Q8N474	Secreted frizzled-related protein 1	0.716	Down	0.020294	SFRP1	35.385	12.099	7.3	2	2	2
Q8N6Y2	Leucine-rich repeat-containing protein 17	0.600667	Down	0.00288764	LRRC17	51.799	14.551	7.9	4	5	4
Q8TD26	Chromodomain-helicase-DNA-binding protein 6	0.685	Down	0.035185	CHD6	305.41	1.9032	0.5	1	2	1
Q8WZ42	Titin	0.639667	Down	0.0282303	TTN	3816	1.6426	0.1	2	2	2
Q92626	Peroxidasin homolog	0.74	Down	0.00147294	PXDN	165.27	20.891	3.2	4	4	4
Q92629	Delta-sarcoglycan	0.737667	Down	0.0357547	SGCD	32.071	104.84	32.9	8	17	8
Q96GP6	Scavenger receptor class F member 2	0.732	Down	0.0048934	SCARF2	92.478	2.4954	2.6	2	7	2
Q96SM3	Probable carboxypeptidase X1	0.646667	Down	0.0101702	CPXM1	81.667	17.332	6.7	3	3	3
Q9BXN1	Asporin	0.730667	Down	0.00637245	ASPN	43.417	64.558	24.7	9	14	9
Q9GZU1	Mucolipin-1	0.756667	Down	0.0199844	MCOLN1	65.022	-2	1.4	1	1	1
Q9H7D0	Dedicator of cytokinesis protein 5	0.758333	Down	0.026413	DOCK5	215.31	7.0077	2	4	5	3
Q9P2B2	Prostaglandin F2 receptor negative regulator	0.641	Down	0.0113847	PTGFRN	98.555	40.888	13.4	11	12	11
Q9TQE0	"HLA class II histocompatibility antigen, DRB1-9 beta chain"	0.725667	Down	0.00837906	HLA-DRB1	29.826	9.6535	32	8	8	3
Q9UBX5	Fibulin-5	0.643667	Down	0.0190293	FBLN5	50.18	46.106	21.9	10	24	10
Q9ULC3	Ras-related protein Rab-23	0.768333	Down	0.0153246	RAB23	26.659	18.383	13.9	3	3	3

## Sheet: Diff distribution
Compared sample name	Up-regulated	Down-regulated
menop/pre_menop	151	65
